# Supplementary material
Source: PubMed Central journal article supplement (PMC4874910)

## Supplementary Material

### Improvement in Cardiovascular Risk Prediction with Electronic Health Records

**Lead Author: Mindy Pike**

**Short Title:** Comparison of QRISKII, FRS, and ASCVD

Mindy M. Pike<sup>1</sup> • Paul A. Decker, MS<sup>1</sup> • Nicholas B. Larson PhD<sup>1</sup> • Jennifer L. St. Sauver, PhD<sup>1,2</sup> • Paul Y. Takahashi, MD, MPH<sup>3</sup> • Véronique L. Roger, MD, MPH<sup>1,4</sup> • Walter A. Rocca, MD, MPH<sup>1,5</sup> • Virginia M. Miller, PhD<sup>6</sup> • Janet E. Olson, PhD<sup>1</sup> • Jyotishman Pathak, PhD<sup>7</sup> • Suzette J. Bielinski, PhD<sup>1</sup>

<sup>1</sup> Department of Health Sciences Research, Mayo Clinic, Rochester, MN, USA

<sup>2</sup> Robert D. and Patricia E. Kern Center for the Science of Health Care Delivery, Mayo Clinic, Rochester, MN, USA

<sup>3</sup> Department of Medicine, Mayo Clinic, Rochester, MN, USA

<sup>4</sup> Division of Cardiovascular Diseases in the Department of Internal Medicine, Mayo Clinic, Rochester, MN, USA

<sup>5</sup> Department of Neurology Mayo Clinic, Rochester, MN, USA

<sup>6</sup> Departments of Surgery and Physiology and Biomedical Engineering, Mayo Clinic, Rochester, MN, USA

<sup>7</sup> Department of Healthcare Policy & Research, Weill Cornell Medical College, New York, NY.

The authors have no conflicts of interest to disclose.

Corresponding Author: Suzette J. Bielinski, Ph.D., Department of Health Sciences Research, Mayo Clinic, 200 First Street SW, Rochester, MN 55905, USA (e-mail: [Bielinski.suzette@mayo.edu](mailto:Bielinski.suzette@mayo.edu)). Telephone: 507-538-4914; Fax: 507-284-1516

**Supplementary Table 1** Comparison of the Framingham Risk Score and QRISKII in A) Women and B) Men using the HOUSES Index

| <u>A) Women</u> |                            | <u>Framingham Risk Score</u> |                       |                        |           |
|-----------------|----------------------------|------------------------------|-----------------------|------------------------|-----------|
|                 | Risk Category <sup>a</sup> | Low Risk                     | Intermediate Low Risk | Intermediate High Risk | High Risk |
| QRISKII         | Low risk                   | 1447 (53)                    | 98 (4)                | 2 (< 1)                | 0 (0)     |
|                 | Intermediate low risk      | 347 (13)                     | 181 (7)               | 14 (1)                 | 1 (< 1)   |
|                 | Intermediate high risk     | 232 (8)                      | 181 (7)               | 73 (3)                 | 3 (< 1)   |
|                 | High risk                  | 33 (1)                       | 63 (2)                | 50 (2)                 | 12 (< 1)  |
| <u>B) Men</u>   |                            | <u>Framingham Risk Score</u> |                       |                        |           |
|                 | Risk Category <sup>a</sup> | Low Risk                     | Intermediate Low Risk | Intermediate High Risk | High Risk |
| QRISKII         | Low risk                   | 255 (20)                     | 49 (4)                | 1 (< 1)                | 0 (0)     |
|                 | Intermediate low risk      | 115 (9)                      | 172 (14)              | 12 (1)                 | 0 (0)     |
|                 | Intermediate high risk     | 61 (5)                       | 232 (18)              | 107 (8)                | 1 (< 1)   |
|                 | High risk                  | 11 (1)                       | 74 (6)                | 137 (11)               | 35 (3)    |

Values are n (%)

<sup>a</sup>Low risk  $\leq$  5%; Intermediate Low Risk 5% -  $\leq$  10%; Intermediate High Risk 10% -  $\leq$  20%; High Risk  $>$ 20%

**Supplementary Table 2** Comparison of the ASCVD and QRISKII in A) Women and

B) Men using the HOUSES Index<sup>a,b</sup>

| <u>A) Women</u> |                            | <u>ASCVD</u> |                       |                        |           |
|-----------------|----------------------------|--------------|-----------------------|------------------------|-----------|
|                 | Risk Category <sup>c</sup> | Low Risk     | Intermediate Low Risk | Intermediate High Risk | High Risk |
| QRISKII         | Low risk                   | 1505 (55)    | 41 (2)                | 1 (< 1)                | 0 (0)     |
|                 | Intermediate low risk      | 262 (10)     | 201 (7)               | 76 (3)                 | 4 (< 1)   |
|                 | Intermediate high risk     | 34 (1)       | 152 (6)               | 194 (7)                | 109 (4)   |
|                 | High risk                  | 1 (< 1)      | 8 (<1)                | 54 (2)                 | 95 (3)    |
| <u>B) Men</u>   |                            | <u>ASCVD</u> |                       |                        |           |
|                 | Risk Category <sup>c</sup> | Low Risk     | Intermediate Low Risk | Intermediate High Risk | High Risk |
| QRISKII         | Low risk                   | 284 (23)     | 20 (2)                | 1 (< 1)                | 0 (0)     |
|                 | Intermediate low risk      | 84 (7)       | 171 (14)              | 43 (3)                 | 1 (< 1)   |
|                 | Intermediate high risk     | 5 (< 1)      | 106 (8)               | 158 (13)               | 132 (10)  |
|                 | High risk                  | 1 (< 1)      | 7 (<1)                | 43 (3)                 | 206 (16)  |

<sup>a</sup>ASCVD atherosclerotic cardiovascular disease

<sup>b</sup> Values are n (%)

<sup>c</sup> Low risk ≤ 5%; Intermediate Low Risk 5% - ≤ 10%; Intermediate High Risk 10% - ≤ 20%; High Risk >20%

Supplementary Figure 1 HOUSES Females

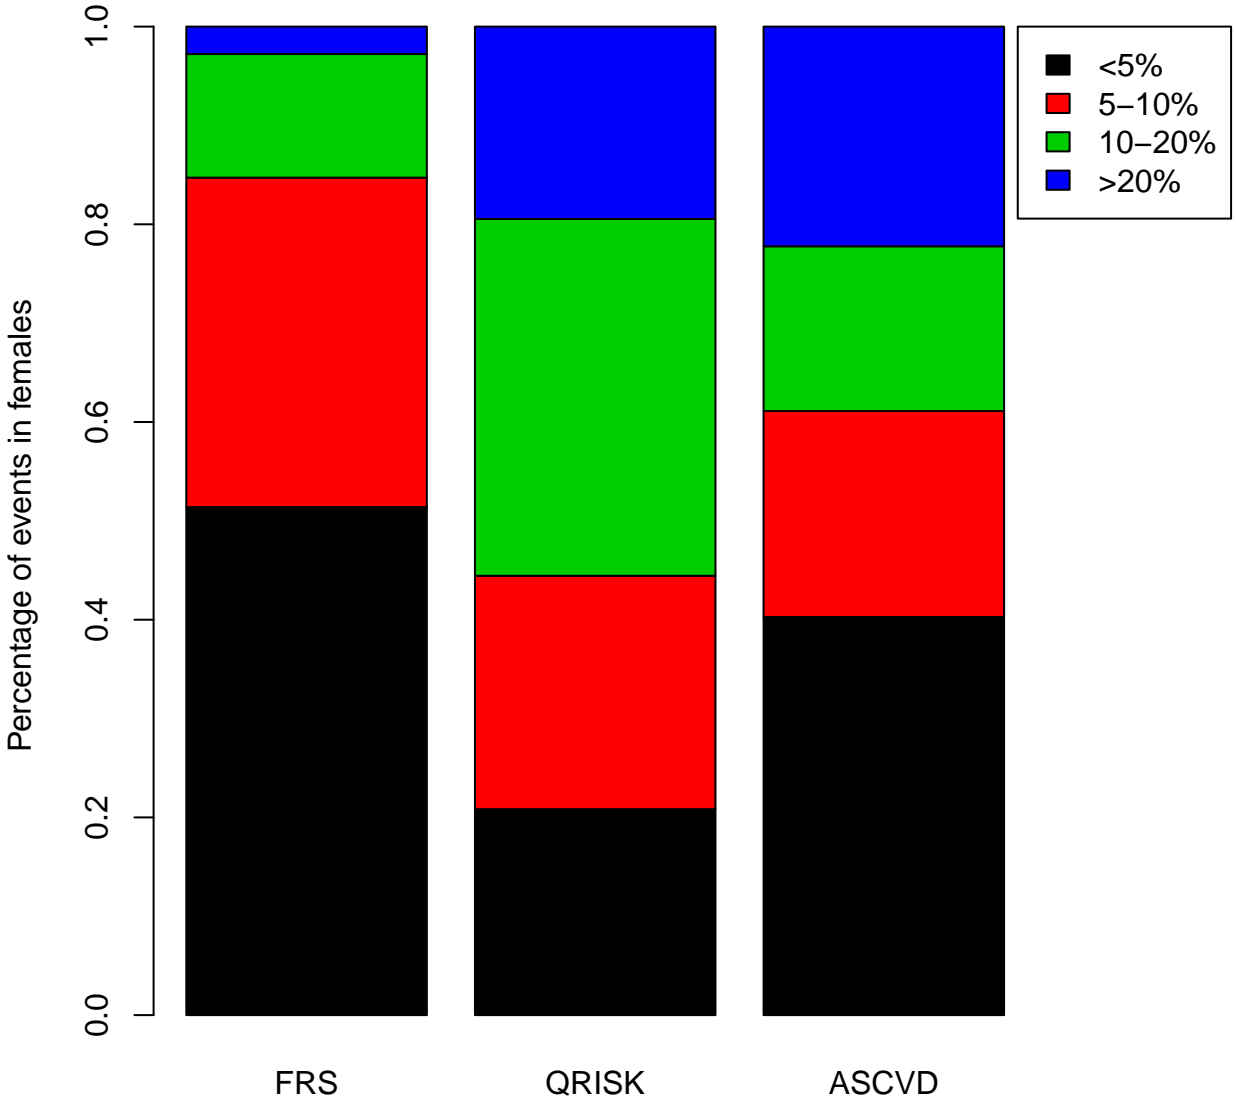

Supplementary Figure 2 HOUSES Males

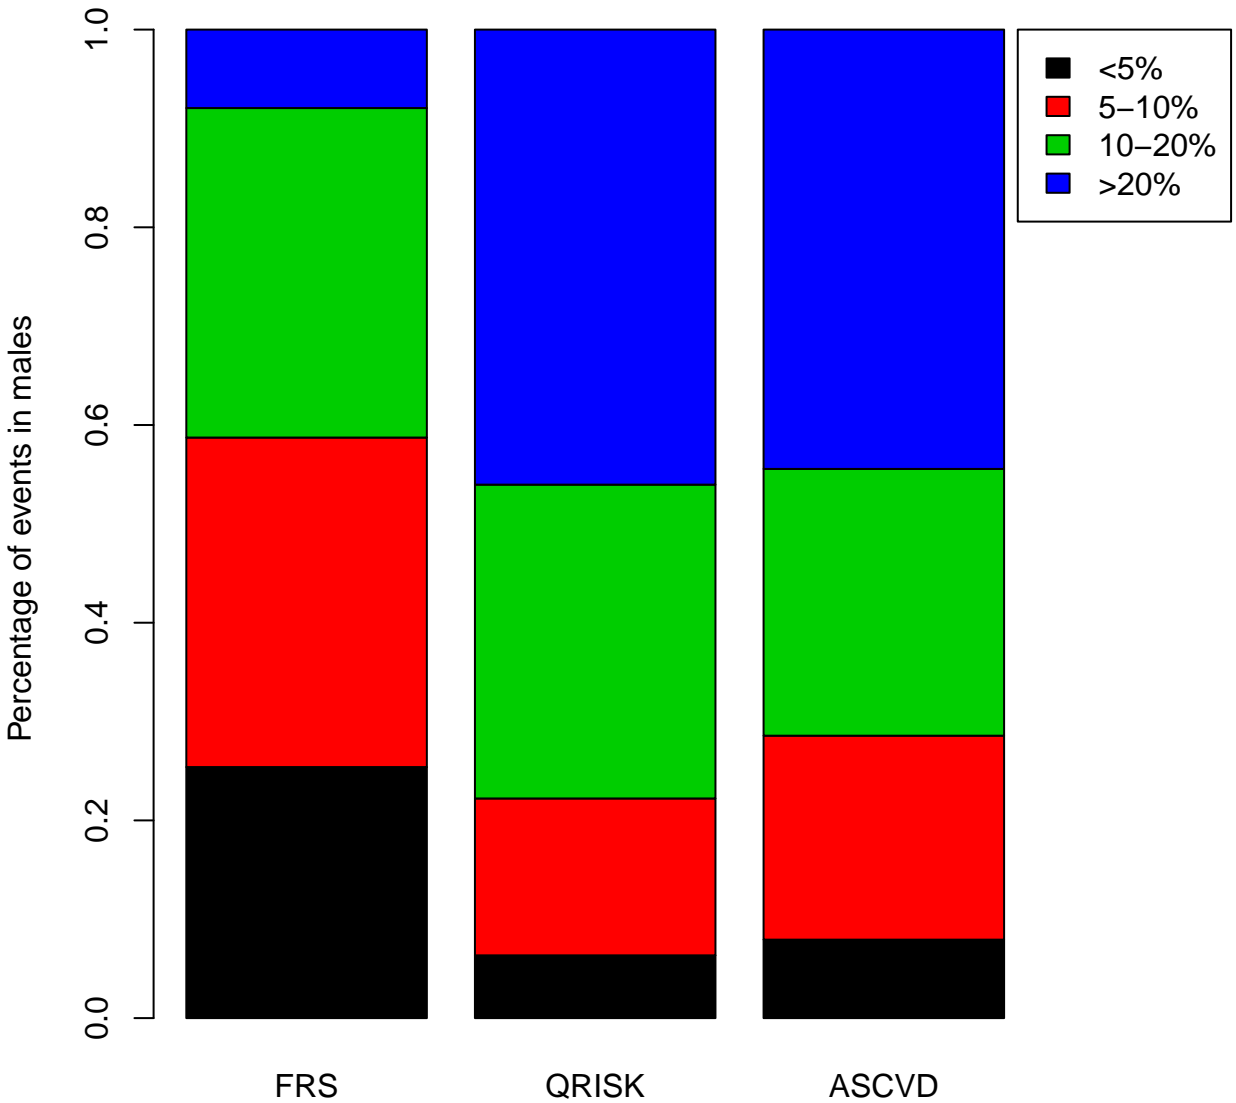

Supplement: NIHMS767362-supplement-SM.pdf [file NIHMS767362-supplement-SM.pdf]
